# Supplementary material for: Colonic miRNA Expression/Secretion, Regulated by Intestinal Epithelial PepT1, Plays an Important Role in Cell-to-Cell Communication during Colitis
Source: PubMed Central journal article supplement (PMC3929505; doi:10.1371/journal.pone.0087614), 2014-02-19
Supplement: pone.0087614.s001.pdf [file pone.0087614.s001.pdf]

**Table S1**

| <b>No.</b> | <b>Reporter Name</b> | <b>p-value</b> | <b>Villin-hPepT1 H2O</b> | <b>Villin-hPepT1 DSS</b> | <b>FVB/N WT H2O</b> | <b>FVB/N WT DSS</b> |
|------------|----------------------|----------------|--------------------------|--------------------------|---------------------|---------------------|
|            |                      |                | <b>Mean</b>              | <b>Mean</b>              | <b>Mean</b>         | <b>Mean</b>         |
| 1          | mmu-miR-132          | 1.07E-08       | 146                      | 1,196                    | 190                 | 575                 |
| 2          | mmu-miR-1937c        | 2.09E-05       | 17                       | 385                      | 136                 | 1,810               |
| 3          | mmu-miR-762          | 3.73E-05       | 1,506                    | 10,682                   | 3,312               | 4,672               |
| 4          | mmu-miR-200b         | 2.20E-04       | 6,182                    | 1,217                    | 6,829               | 6,328               |
| 5          | mmu-miR-429          | 6.66E-04       | 486                      | 83                       | 710                 | 514                 |
| 6          | mmu-miR-1937b        | 7.18E-04       | 2,288                    | 15,875                   | 6,408               | 18,278              |
| 7          | mmu-miR-23b          | 9.14E-04       | 10,593                   | 3,402                    | 8,243               | 4,658               |
| 8          | mmu-miR-1937a        | 9.83E-04       | 2,108                    | 17,093                   | 6,412               | 18,528              |
| 9          | mmu-miR-199a-3p      | 1.11E-03       | 614                      | 267                      | 239                 | 256                 |
| 10         | mmu-miR-23a          | 1.37E-03       | 9,029                    | 2,797                    | 6,877               | 3,608               |
| 11         | mmu-miR-3077         | 2.05E-03       | 270                      | 3,636                    | 1,089               | 1,293               |
| 12         | mmu-miR-1934         | 2.39E-03       | 145                      | 862                      | 82                  | 91                  |
| 13         | mmu-let-7a           | 2.64E-03       | 23,694                   | 15,560                   | 21,543              | 19,807              |
| 14         | mmu-miR-2145         | 2.87E-03       | 418                      | 2,100                    | 809                 | 737                 |
| 15         | mmu-let-7c           | 9.39E-03       | 24,980                   | 16,533                   | 23,931              | 21,005              |
