# Supplementary material for: Colonic miRNA Expression/Secretion, Regulated by Intestinal Epithelial PepT1, Plays an Important Role in Cell-to-Cell Communication during Colitis
Source: PubMed Central journal article supplement (PMC3929505; doi:10.1371/journal.pone.0087614), 2014-02-19
Supplement: pone.0087614.s003.pdf [file pone.0087614.s003.pdf]

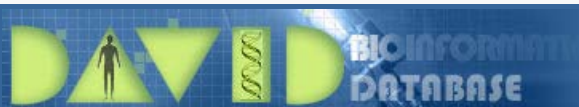

## Functional Annotation Clustering

[Help and Manual](#)

Current Gene List: List\_1

Current Background: Mus musculus

453 DAVID IDs

Options    Classification Stringency    Medium

30 Cluster(s)

[Download File](#)

| Annotation Cluster          | Enrichment Score                                                                |          | Count | P_Value | Benjamini |
|-----------------------------|---------------------------------------------------------------------------------|----------|-------|---------|-----------|
| <b>Annotation Cluster 1</b> | <b>Enrichment Score: 4.77</b>                                                   | <b>G</b> |       |         |           |
| SP_PIR_KEYWORDS             | <a href="#">transcription regulation</a>                                        | RT       | 72    | 1.2E-7  | 1.9E-5    |
| SP_PIR_KEYWORDS             | <a href="#">Transcription</a>                                                   | RT       | 72    | 1.6E-5  | 1.7E-3    |
| SP_PIR_KEYWORDS             | <a href="#">nucleus</a>                                                         | RT       | 128   | 5.1E-5  | 4.0E-3    |
| SP_PIR_KEYWORDS             | <a href="#">dna-binding</a>                                                     | RT       | 54    | 9.0E-4  | 2.6E-2    |
| <b>Annotation Cluster 2</b> | <b>Enrichment Score: 3.31</b>                                                   | <b>G</b> |       |         |           |
| SP_PIR_KEYWORDS             | <a href="#">isopeptide bond</a>                                                 | RT       | 18    | 4.6E-4  | 2.1E-2    |
| SP_PIR_KEYWORDS             | <a href="#">ubl conjugation</a>                                                 | RT       | 27    | 5.0E-4  | 2.0E-2    |
| UP_SEQ_FEATURE              | cross-link: Glycyl lysine isopeptide (Lys-Gly) (interchain with G-Cter in SUMO) | RT       | 10    | 5.1E-4  | 1.4E-1    |
| <b>Annotation Cluster 3</b> | <b>Enrichment Score: 2.17</b>                                                   | <b>G</b> |       |         |           |
| SP_PIR_KEYWORDS             | <a href="#">nucleotide-binding</a>                                              | RT       | 64    | 1.5E-4  | 9.6E-3    |
| SP_PIR_KEYWORDS             | <a href="#">atp-binding</a>                                                     | RT       | 51    | 6.8E-4  | 2.1E-2    |
| SP_PIR_KEYWORDS             | <a href="#">transferase</a>                                                     | RT       | 53    | 1.1E-3  | 2.8E-2    |
| SP_PIR_KEYWORDS             | <a href="#">kinase</a>                                                          | RT       | 28    | 1.4E-2  | 1.9E-1    |
| UP_SEQ_FEATURE              | domain:Protein kinase                                                           | RT       | 22    | 1.5E-2  | 6.9E-1    |
| UP_SEQ_FEATURE              | binding site:ATP                                                                | RT       | 24    | 1.8E-2  | 7.2E-1    |
| UP_SEQ_FEATURE              | nucleotide phosphate-binding region:ATP                                         | RT       | 35    | 2.4E-2  | 7.5E-1    |
| SP_PIR_KEYWORDS             | <a href="#">serine/threonine-protein kinase</a>                                 | RT       | 17    | 2.6E-2  | 2.3E-1    |
| UP_SEQ_FEATURE              | active site:Proton acceptor                                                     | RT       | 24    | 1.1E-1  | 9.3E-1    |
| <b>Annotation Cluster 4</b> | <b>Enrichment Score: 2.05</b>                                                   | <b>G</b> |       |         |           |
| SP_PIR_KEYWORDS             | <a href="#">golgi apparatus</a>                                                 | RT       | 28    | 5.0E-4  | 1.8E-2    |
| UP_SEQ_FEATURE              | topological domain:Lumenal                                                      | RT       | 20    | 1.4E-2  | 7.2E-1    |
| SP_PIR_KEYWORDS             | <a href="#">glycosyltransferase</a>                                             | RT       | 11    | 2.4E-2  | 2.3E-1    |
| SP_PIR_KEYWORDS             | <a href="#">Signal-anchor</a>                                                   | RT       | 17    | 3.9E-2  | 2.9E-1    |
| <b>Annotation Cluster 5</b> | <b>Enrichment Score: 2</b>                                                      | <b>G</b> |       |         |           |
| UP_SEQ_FEATURE              | domain:W2                                                                       | RT       | 5     | 1.6E-5  | 2.3E-2    |
| SP_PIR_KEYWORDS             | <a href="#">Initiation factor</a>                                               | RT       | 4     | 1.5E-1  | 6.0E-1    |
| SP_PIR_KEYWORDS             | <a href="#">protein biosynthesis</a>                                            | RT       | 5     | 4.4E-1  | 8.7E-1    |
| <b>Annotation Cluster 6</b> | <b>Enrichment Score: 1.83</b>                                                   | <b>G</b> |       |         |           |
| UP_SEQ_FEATURE              | repeat:LDL-receptor class B 5                                                   | RT       | 5     | 2.0E-4  | 9.3E-2    |
| UP_SEQ_FEATURE              | repeat:LDL-receptor class B 1                                                   | RT       | 5     | 2.8E-4  | 9.8E-2    |
| UP_SEQ_FEATURE              | repeat:LDL-receptor class B 2                                                   | RT       | 5     | 2.8E-4  | 9.8E-2    |
| UP_SEQ_FEATURE              | repeat:LDL-receptor class B 3                                                   | RT       | 5     | 2.8E-4  | 9.8E-2    |
| UP_SEQ_FEATURE              | repeat:LDL-receptor class B 4                                                   | RT       | 5     | 2.8E-4  | 9.8E-2    |
| UP_SEQ_FEATURE              | repeat:LDL-receptor class B 6                                                   | RT       | 4     | 1.4E-3  | 2.5E-1    |
| UP_SEQ_FEATURE              | repeat:LDL-receptor class B 10                                                  | RT       | 3     | 9.7E-3  | 7.0E-1    |
| UP_SEQ_FEATURE              | repeat:LDL-receptor class B 14                                                  | RT       | 3     | 9.7E-3  | 7.0E-1    |
| UP_SEQ_FEATURE              | repeat:LDL-receptor class B 13                                                  | RT       | 3     | 9.7E-3  | 7.0E-1    |

|                              |                                         |                               |  |          |        |        |
|------------------------------|-----------------------------------------|-------------------------------|--|----------|--------|--------|
| UP_SEQ_FEATURE               | repeat:LDL-receptor class B 12          | <a href="#">RT</a>            |  | 3        | 9.7E-3 | 7.0E-1 |
| UP_SEQ_FEATURE               | repeat:LDL-receptor class B 11          | <a href="#">RT</a>            |  | 3        | 9.7E-3 | 7.0E-1 |
| UP_SEQ_FEATURE               | repeat:LDL-receptor class B 18          | <a href="#">RT</a>            |  | 3        | 9.7E-3 | 7.0E-1 |
| UP_SEQ_FEATURE               | repeat:LDL-receptor class B 17          | <a href="#">RT</a>            |  | 3        | 9.7E-3 | 7.0E-1 |
| UP_SEQ_FEATURE               | repeat:LDL-receptor class B 16          | <a href="#">RT</a>            |  | 3        | 9.7E-3 | 7.0E-1 |
| UP_SEQ_FEATURE               | repeat:LDL-receptor class B 15          | <a href="#">RT</a>            |  | 3        | 9.7E-3 | 7.0E-1 |
| UP_SEQ_FEATURE               | repeat:LDL-receptor class B 19          | <a href="#">RT</a>            |  | 3        | 9.7E-3 | 7.0E-1 |
| UP_SEQ_FEATURE               | repeat:LDL-receptor class B 20          | <a href="#">RT</a>            |  | 3        | 9.7E-3 | 7.0E-1 |
| UP_SEQ_FEATURE               | repeat:LDL-receptor class B 9           | <a href="#">RT</a>            |  | 3        | 9.7E-3 | 7.0E-1 |
| UP_SEQ_FEATURE               | repeat:LDL-receptor class B 7           | <a href="#">RT</a>            |  | 3        | 1.3E-2 | 7.3E-1 |
| UP_SEQ_FEATURE               | repeat:LDL-receptor class B 8           | <a href="#">RT</a>            |  | 3        | 1.3E-2 | 7.3E-1 |
| UP_SEQ_FEATURE               | domain:LDL-receptor class A 3           | <a href="#">RT</a>            |  | 4        | 1.5E-2 | 7.1E-1 |
| UP_SEQ_FEATURE               | domain:LDL-receptor class A 8           | <a href="#">RT</a>            |  | 3        | 1.7E-2 | 7.3E-1 |
| UP_SEQ_FEATURE               | domain:LDL-receptor class A 1           | <a href="#">RT</a>            |  | 4        | 2.2E-2 | 7.6E-1 |
| UP_SEQ_FEATURE               | domain:LDL-receptor class A 2           | <a href="#">RT</a>            |  | 4        | 2.4E-2 | 7.3E-1 |
| UP_SEQ_FEATURE               | domain:LDL-receptor class A 7           | <a href="#">RT</a>            |  | 3        | 2.7E-2 | 7.3E-1 |
| UP_SEQ_FEATURE               | domain:LDL-receptor class A 6           | <a href="#">RT</a>            |  | 3        | 2.7E-2 | 7.3E-1 |
| UP_SEQ_FEATURE               | domain:EGF-like 3                       | <a href="#">RT</a>            |  | 6        | 3.0E-2 | 7.5E-1 |
| UP_SEQ_FEATURE               | domain:LDL-receptor class A 5           | <a href="#">RT</a>            |  | 3        | 3.3E-2 | 7.7E-1 |
| UP_SEQ_FEATURE               | domain:EGF-like 4                       | <a href="#">RT</a>            |  | 5        | 4.2E-2 | 8.3E-1 |
| UP_SEQ_FEATURE               | domain:LDL-receptor class A 4           | <a href="#">RT</a>            |  | 3        | 5.1E-2 | 8.6E-1 |
| UP_SEQ_FEATURE               | short sequence motif:Endocytosis signal | <a href="#">RT</a>            |  | 3        | 5.1E-2 | 8.6E-1 |
| UP_SEQ_FEATURE               | domain:EGF-like 1                       | <a href="#">RT</a>            |  | 7        | 6.1E-2 | 8.7E-1 |
| UP_SEQ_FEATURE               | domain:EGF-like 6                       | <a href="#">RT</a>            |  | 4        | 7.3E-2 | 9.0E-1 |
| SP_PIR_KEYWORDS              | <a href="#">Endocytosis</a>             | <a href="#">RT</a>            |  | 6        | 7.6E-2 | 4.2E-1 |
| SP_PIR_KEYWORDS              | <a href="#">egf-like domain</a>         | <a href="#">RT</a>            |  | 10       | 9.3E-2 | 4.8E-1 |
| UP_SEQ_FEATURE               | domain:EGF-like 7                       | <a href="#">RT</a>            |  | 3        | 1.4E-1 | 9.5E-1 |
| UP_SEQ_FEATURE               | domain:EGF-like 8                       | <a href="#">RT</a>            |  | 3        | 1.5E-1 | 9.6E-1 |
| UP_SEQ_FEATURE               | domain:EGF-like 5                       | <a href="#">RT</a>            |  | 3        | 2.7E-1 | 9.9E-1 |
| UP_SEQ_FEATURE               | domain:EGF-like 2                       | <a href="#">RT</a>            |  | 4        | 3.5E-1 | 1.0E0  |
| UP_SEQ_FEATURE               | domain:EGF-like 2; calcium-binding      | <a href="#">RT</a>            |  | 3        | 4.0E-1 | 1.0E0  |
| <b>Annotation Cluster 7</b>  |                                         | <b>Enrichment Score: 1.56</b> |  | <b>G</b> |        |        |
| SP_PIR_KEYWORDS              | <a href="#">nucleotide binding</a>      | <a href="#">RT</a>            |  | 6        | 2.0E-2 | 2.2E-1 |
| SP_PIR_KEYWORDS              | <a href="#">P-loop</a>                  | <a href="#">RT</a>            |  | 6        | 2.1E-2 | 2.2E-1 |
| SP_PIR_KEYWORDS              | <a href="#">GTP binding</a>             | <a href="#">RT</a>            |  | 4        | 5.3E-2 | 3.5E-1 |
| <b>Annotation Cluster 8</b>  |                                         | <b>Enrichment Score: 1.37</b> |  | <b>G</b> |        |        |
| UP_SEQ_FEATURE               | calcium-binding region: 2               | <a href="#">RT</a>            |  | 9        | 8.6E-3 | 6.9E-1 |
| UP_SEQ_FEATURE               | calcium-binding region: 1               | <a href="#">RT</a>            |  | 9        | 1.4E-2 | 7.1E-1 |
| UP_SEQ_FEATURE               | domain:EF-hand 2                        | <a href="#">RT</a>            |  | 10       | 2.6E-2 | 7.3E-1 |
| UP_SEQ_FEATURE               | domain:EF-hand 1                        | <a href="#">RT</a>            |  | 9        | 6.3E-2 | 8.8E-1 |
| UP_SEQ_FEATURE               | domain:EF-hand 3                        | <a href="#">RT</a>            |  | 5        | 1.7E-1 | 9.7E-1 |
| SP_PIR_KEYWORDS              | <a href="#">calcium</a>                 | <a href="#">RT</a>            |  | 23       | 1.8E-1 | 6.5E-1 |
| <b>Annotation Cluster 9</b>  |                                         | <b>Enrichment Score: 1.35</b> |  | <b>G</b> |        |        |
| SP_PIR_KEYWORDS              | <a href="#">cell division</a>           | <a href="#">RT</a>            |  | 13       | 2.3E-2 | 2.3E-1 |
| SP_PIR_KEYWORDS              | <a href="#">cell cycle</a>              | <a href="#">RT</a>            |  | 19       | 2.6E-2 | 2.2E-1 |
| SP_PIR_KEYWORDS              | <a href="#">mitosis</a>                 | <a href="#">RT</a>            |  | 8        | 1.5E-1 | 6.0E-1 |
| <b>Annotation Cluster 10</b> |                                         | <b>Enrichment Score: 1.12</b> |  | <b>G</b> |        |        |
| UP_SEQ_FEATURE               | short sequence motif:DEAD box           | <a href="#">RT</a>            |  | 4        | 4.4E-2 | 8.3E-1 |
| UP_SEQ_FEATURE               | short sequence motif:Q motif            | <a href="#">RT</a>            |  | 4        | 5.5E-2 | 8.7E-1 |
| UP_SEQ_FEATURE               | domain:Helicase C-terminal              | <a href="#">RT</a>            |  | 6        | 7.7E-2 | 9.1E-1 |
| UP_SEQ_FEATURE               | domain:Helicase ATP-binding             | <a href="#">RT</a>            |  | 6        | 8.6E-2 | 9.1E-1 |

| SP_PIR_KEYWORDS                                     | <a href="#">helicase</a>                               | RT        |  | 6        | 1.7E-1 | 6.2E-1 |
|-----------------------------------------------------|--------------------------------------------------------|-----------|--|----------|--------|--------|
| <b>Annotation Cluster 11</b> Enrichment Score: 1.1  |                                                        |           |  | <b>G</b> |        |        |
| Count                                               | P_Value                                                | Benjamini |  |          |        |        |
| UP_SEQ_FEATURE                                      | domain: WW 3                                           | RT        |  | 3        | 1.7E-2 | 7.3E-1 |
| UP_SEQ_FEATURE                                      | domain: WW 2                                           | RT        |  | 3        | 1.7E-1 | 9.7E-1 |
| UP_SEQ_FEATURE                                      | domain: WW 1                                           | RT        |  | 3        | 1.7E-1 | 9.7E-1 |
| <b>Annotation Cluster 12</b> Enrichment Score: 0.99 |                                                        |           |  | <b>G</b> |        |        |
| Count                                               | P_Value                                                | Benjamini |  |          |        |        |
| SP_PIR_KEYWORDS                                     | <a href="#">lipoprotein</a>                            | RT        |  | 24       | 1.8E-2 | 2.2E-1 |
| SP_PIR_KEYWORDS                                     | <a href="#">palmitate</a>                              | RT        |  | 10       | 6.4E-2 | 4.0E-1 |
| UP_SEQ_FEATURE                                      | lipid moiety-binding region: S-palmitoyl cysteine      | RT        |  | 9        | 9.2E-2 | 9.1E-1 |
| SP_PIR_KEYWORDS                                     | <a href="#">transducer</a>                             | RT        |  | 9        | 1.0E0  | 1.0E0  |
| <b>Annotation Cluster 13</b> Enrichment Score: 0.92 |                                                        |           |  | <b>G</b> |        |        |
| Count                                               | P_Value                                                | Benjamini |  |          |        |        |
| UP_SEQ_FEATURE                                      | domain: IQ 3                                           | RT        |  | 3        | 5.8E-2 | 8.8E-1 |
| UP_SEQ_FEATURE                                      | domain: IQ 2                                           | RT        |  | 3        | 1.7E-1 | 9.7E-1 |
| UP_SEQ_FEATURE                                      | domain: IQ 1                                           | RT        |  | 3        | 1.8E-1 | 9.7E-1 |
| <b>Annotation Cluster 14</b> Enrichment Score: 0.89 |                                                        |           |  | <b>G</b> |        |        |
| Count                                               | P_Value                                                | Benjamini |  |          |        |        |
| UP_SEQ_FEATURE                                      | metal ion-binding site: Calcium 2; via carbonyl oxygen | RT        |  | 4        | 7.3E-2 | 9.0E-1 |
| UP_SEQ_FEATURE                                      | metal ion-binding site: Calcium 3; via carbonyl oxygen | RT        |  | 3        | 1.0E-1 | 9.3E-1 |
| UP_SEQ_FEATURE                                      | metal ion-binding site: Calcium 2                      | RT        |  | 4        | 1.8E-1 | 9.7E-1 |
| UP_SEQ_FEATURE                                      | metal ion-binding site: Calcium 3                      | RT        |  | 3        | 2.0E-1 | 9.8E-1 |
| <b>Annotation Cluster 15</b> Enrichment Score: 0.63 |                                                        |           |  | <b>G</b> |        |        |
| Count                                               | P_Value                                                | Benjamini |  |          |        |        |
| UP_SEQ_FEATURE                                      | zinc finger region: C2H2-type 7; atypical              | RT        |  | 3        | 2.0E-3 | 3.1E-1 |
| UP_SEQ_FEATURE                                      | zinc finger region: C2H2-type 3                        | RT        |  | 11       | 1.3E-1 | 9.5E-1 |
| UP_SEQ_FEATURE                                      | zinc finger region: C2H2-type 1                        | RT        |  | 11       | 1.3E-1 | 9.5E-1 |
| UP_SEQ_FEATURE                                      | zinc finger region: C2H2-type 2                        | RT        |  | 11       | 1.5E-1 | 9.6E-1 |
| UP_SEQ_FEATURE                                      | zinc finger region: C2H2-type 6                        | RT        |  | 6        | 3.7E-1 | 1.0E0  |
| UP_SEQ_FEATURE                                      | zinc finger region: C2H2-type 5                        | RT        |  | 7        | 3.7E-1 | 1.0E0  |
| UP_SEQ_FEATURE                                      | zinc finger region: C2H2-type 4                        | RT        |  | 7        | 4.6E-1 | 1.0E0  |
| UP_SEQ_FEATURE                                      | zinc finger region: C2H2-type 10                       | RT        |  | 3        | 6.9E-1 | 1.0E0  |
| UP_SEQ_FEATURE                                      | zinc finger region: C2H2-type 9                        | RT        |  | 3        | 7.4E-1 | 1.0E0  |
| UP_SEQ_FEATURE                                      | zinc finger region: C2H2-type 8                        | RT        |  | 3        | 8.2E-1 | 1.0E0  |
| UP_SEQ_FEATURE                                      | zinc finger region: C2H2-type 7                        | RT        |  | 3        | 8.5E-1 | 1.0E0  |
| <b>Annotation Cluster 16</b> Enrichment Score: 0.62 |                                                        |           |  | <b>G</b> |        |        |
| Count                                               | P_Value                                                | Benjamini |  |          |        |        |
| UP_SEQ_FEATURE                                      | repeat: ANK 9                                          | RT        |  | 4        | 6.0E-2 | 8.8E-1 |
| UP_SEQ_FEATURE                                      | repeat: ANK 8                                          | RT        |  | 4        | 8.3E-2 | 9.1E-1 |
| UP_SEQ_FEATURE                                      | repeat: ANK 10                                         | RT        |  | 3        | 1.3E-1 | 9.5E-1 |
| UP_SEQ_FEATURE                                      | repeat: ANK 7                                          | RT        |  | 4        | 1.6E-1 | 9.7E-1 |
| SP_PIR_KEYWORDS                                     | <a href="#">ank repeat</a>                             | RT        |  | 8        | 3.0E-1 | 7.7E-1 |
| UP_SEQ_FEATURE                                      | repeat: ANK 6                                          | RT        |  | 4        | 3.4E-1 | 1.0E0  |
| UP_SEQ_FEATURE                                      | repeat: ANK 1                                          | RT        |  | 7        | 3.9E-1 | 1.0E0  |
| UP_SEQ_FEATURE                                      | repeat: ANK 2                                          | RT        |  | 7        | 3.9E-1 | 1.0E0  |
| UP_SEQ_FEATURE                                      | repeat: ANK 3                                          | RT        |  | 6        | 4.1E-1 | 1.0E0  |
| UP_SEQ_FEATURE                                      | repeat: ANK 4                                          | RT        |  | 5        | 4.3E-1 | 1.0E0  |
| UP_SEQ_FEATURE                                      | repeat: ANK 5                                          | RT        |  | 4        | 5.4E-1 | 1.0E0  |
| <b>Annotation Cluster 17</b> Enrichment Score: 0.57 |                                                        |           |  | <b>G</b> |        |        |
| Count                                               | P_Value                                                | Benjamini |  |          |        |        |
| UP_SEQ_FEATURE                                      | region of interest: Actin-binding                      | RT        |  | 3        | 1.3E-1 | 9.5E-1 |
| UP_SEQ_FEATURE                                      | domain: Myosin head-like                               | RT        |  | 3        | 1.8E-1 | 9.7E-1 |
| SP_PIR_KEYWORDS                                     | <a href="#">calmodulin-binding</a>                     | RT        |  | 5        | 2.4E-1 | 7.2E-1 |
| SP_PIR_KEYWORDS                                     | <a href="#">myosin</a>                                 | RT        |  | 3        | 3.2E-1 | 7.9E-1 |
| SP_PIR_KEYWORDS                                     | <a href="#">motor protein</a>                          | RT        |  | 3        | 8.0E-1 | 9.8E-1 |
| <b>Annotation Cluster 18</b> Enrichment Score: 0.54 |                                                        |           |  | <b>G</b> |        |        |
| Count                                               | P_Value                                                | Benjamini |  |          |        |        |
| SP_PIR_KEYWORDS                                     | <a href="#">tyrosine-protein kinase</a>                | RT        |  | 6        | 1.5E-1 | 6.0E-1 |

|                                                                     |                                                        |    |  |              |                |                  |
|---------------------------------------------------------------------|--------------------------------------------------------|----|--|--------------|----------------|------------------|
| UP_SEQ_FEATURE                                                      | domain:Fibronectin type-III 2                          | RT |  | 5            | 3.9E-1         | 1.0E0            |
| UP_SEQ_FEATURE                                                      | domain:Fibronectin type-III 1                          | RT |  | 5            | 4.0E-1         | 1.0E0            |
| <b>Annotation Cluster 19</b> <b>Enrichment Score: 0.51</b> <b>G</b> |                                                        |    |  | <b>Count</b> | <b>P_Value</b> | <b>Benjamini</b> |
| UP_SEQ_FEATURE                                                      | repeat:WD 13                                           | RT |  | 3            | 8.8E-2         | 9.1E-1           |
| UP_SEQ_FEATURE                                                      | repeat:WD 12                                           | RT |  | 3            | 1.0E-1         | 9.3E-1           |
| UP_SEQ_FEATURE                                                      | repeat:WD 8                                            | RT |  | 4            | 1.3E-1         | 9.5E-1           |
| UP_SEQ_FEATURE                                                      | repeat:WD 11                                           | RT |  | 3            | 1.6E-1         | 9.6E-1           |
| UP_SEQ_FEATURE                                                      | repeat:WD 10                                           | RT |  | 3            | 1.6E-1         | 9.6E-1           |
| UP_SEQ_FEATURE                                                      | repeat:WD 9                                            | RT |  | 3            | 2.3E-1         | 9.9E-1           |
| UP_SEQ_FEATURE                                                      | repeat:WD 7                                            | RT |  | 6            | 2.3E-1         | 9.9E-1           |
| UP_SEQ_FEATURE                                                      | repeat:WD 6                                            | RT |  | 6            | 4.2E-1         | 1.0E0            |
| UP_SEQ_FEATURE                                                      | repeat:WD 5                                            | RT |  | 6            | 6.2E-1         | 1.0E0            |
| SP_PIR_KEYWORDS                                                     | <a href="#">wd repeat</a>                              | RT |  | 7            | 6.2E-1         | 9.4E-1           |
| UP_SEQ_FEATURE                                                      | repeat:WD 4                                            | RT |  | 6            | 6.8E-1         | 1.0E0            |
| UP_SEQ_FEATURE                                                      | repeat:WD 3                                            | RT |  | 6            | 7.3E-1         | 1.0E0            |
| UP_SEQ_FEATURE                                                      | repeat:WD 1                                            | RT |  | 6            | 7.5E-1         | 1.0E0            |
| UP_SEQ_FEATURE                                                      | repeat:WD 2                                            | RT |  | 6            | 7.5E-1         | 1.0E0            |
| <b>Annotation Cluster 20</b> <b>Enrichment Score: 0.47</b> <b>G</b> |                                                        |    |  | <b>Count</b> | <b>P_Value</b> | <b>Benjamini</b> |
| SP_PIR_KEYWORDS                                                     | <a href="#">voltage-gated channel</a>                  | RT |  | 6            | 2.3E-1         | 7.2E-1           |
| SP_PIR_KEYWORDS                                                     | <a href="#">potassium channel</a>                      | RT |  | 4            | 2.4E-1         | 7.2E-1           |
| SP_PIR_KEYWORDS                                                     | <a href="#">potassium transport</a>                    | RT |  | 5            | 2.6E-1         | 7.5E-1           |
| SP_PIR_KEYWORDS                                                     | <a href="#">potassium</a>                              | RT |  | 5            | 3.2E-1         | 7.9E-1           |
| SP_PIR_KEYWORDS                                                     | <a href="#">ion transport</a>                          | RT |  | 14           | 5.6E-1         | 9.2E-1           |
| SP_PIR_KEYWORDS                                                     | <a href="#">ionic channel</a>                          | RT |  | 8            | 6.0E-1         | 9.3E-1           |
| <b>Annotation Cluster 21</b> <b>Enrichment Score: 0.43</b> <b>G</b> |                                                        |    |  | <b>Count</b> | <b>P_Value</b> | <b>Benjamini</b> |
| SP_PIR_KEYWORDS                                                     | <a href="#">zinc-finger</a>                            | RT |  | 35           | 2.0E-1         | 6.8E-1           |
| SP_PIR_KEYWORDS                                                     | <a href="#">metal-binding</a>                          | RT |  | 68           | 4.2E-1         | 8.6E-1           |
| SP_PIR_KEYWORDS                                                     | <a href="#">zinc</a>                                   | RT |  | 46           | 5.8E-1         | 9.3E-1           |
| <b>Annotation Cluster 22</b> <b>Enrichment Score: 0.42</b> <b>G</b> |                                                        |    |  | <b>Count</b> | <b>P_Value</b> | <b>Benjamini</b> |
| UP_SEQ_FEATURE                                                      | domain:BACK                                            | RT |  | 3            | 1.6E-1         | 9.6E-1           |
| UP_SEQ_FEATURE                                                      | domain:BTB                                             | RT |  | 5            | 3.5E-1         | 1.0E0            |
| UP_SEQ_FEATURE                                                      | repeat:Kelch 5                                         | RT |  | 3            | 4.0E-1         | 1.0E0            |
| UP_SEQ_FEATURE                                                      | repeat:Kelch 4                                         | RT |  | 3            | 4.3E-1         | 1.0E0            |
| UP_SEQ_FEATURE                                                      | repeat:Kelch 3                                         | RT |  | 3            | 4.5E-1         | 1.0E0            |
| UP_SEQ_FEATURE                                                      | repeat:Kelch 2                                         | RT |  | 3            | 4.5E-1         | 1.0E0            |
| UP_SEQ_FEATURE                                                      | repeat:Kelch 1                                         | RT |  | 3            | 4.5E-1         | 1.0E0            |
| SP_PIR_KEYWORDS                                                     | <a href="#">kelch repeat</a>                           | RT |  | 3            | 4.9E-1         | 9.0E-1           |
| <b>Annotation Cluster 23</b> <b>Enrichment Score: 0.38</b> <b>G</b> |                                                        |    |  | <b>Count</b> | <b>P_Value</b> | <b>Benjamini</b> |
| UP_SEQ_FEATURE                                                      | lipid moiety-binding region:GPI-anchor amidated serine | RT |  | 4            | 1.8E-1         | 9.7E-1           |
| SP_PIR_KEYWORDS                                                     | <a href="#">gpi-anchor</a>                             | RT |  | 4            | 5.8E-1         | 9.3E-1           |
| UP_SEQ_FEATURE                                                      | propeptide:Removed in mature form                      | RT |  | 6            | 6.9E-1         | 1.0E0            |
| <b>Annotation Cluster 24</b> <b>Enrichment Score: 0.36</b> <b>G</b> |                                                        |    |  | <b>Count</b> | <b>P_Value</b> | <b>Benjamini</b> |
| SP_PIR_KEYWORDS                                                     | <a href="#">protein phosphatase</a>                    | RT |  | 5            | 3.3E-1         | 8.0E-1           |
| UP_SEQ_FEATURE                                                      | domain:Tyrosine-protein phosphatase                    | RT |  | 3            | 4.2E-1         | 1.0E0            |
| UP_SEQ_FEATURE                                                      | active site:Phosphocysteine intermediate               | RT |  | 3            | 5.9E-1         | 1.0E0            |
| <b>Annotation Cluster 25</b> <b>Enrichment Score: 0.34</b> <b>G</b> |                                                        |    |  | <b>Count</b> | <b>P_Value</b> | <b>Benjamini</b> |
| SP_PIR_KEYWORDS                                                     | <a href="#">glycoprotein</a>                           | RT |  | 96           | 2.0E-1         | 6.8E-1           |
| SP_PIR_KEYWORDS                                                     | <a href="#">disulfide bond</a>                         | RT |  | 63           | 4.1E-1         | 8.5E-1           |
| SP_PIR_KEYWORDS                                                     | <a href="#">signal</a>                                 | RT |  | 75           | 4.3E-1         | 8.7E-1           |
| SP_PIR_KEYWORDS                                                     | <a href="#">Secreted</a>                               | RT |  | 36           | 5.1E-1         | 9.0E-1           |
| UP_SEQ_FEATURE                                                      | glycosylation site:N-linked (GlcNac...)                | RT |  | 91           | 5.5E-1         | 1.0E0            |
| UP_SEQ_FEATURE                                                      | disulfide bond                                         | RT |  | 62           | 6.1E-1         | 1.0E0            |

|                                                     |                                          |    |  |          |        |        |
|-----------------------------------------------------|------------------------------------------|----|--|----------|--------|--------|
| UP_SEQ_FEATURE                                      | signal peptide                           | RT |  | 75       | 7.2E-1 | 1.0E0  |
| <b>Annotation Cluster 26</b> Enrichment Score: 0.33 |                                          |    |  | <b>G</b> |        |        |
| UP_SEQ_FEATURE                                      | domain: Ig-like C2-type 1                | RT |  | 5        | 4.5E-1 | 1.0E0  |
| UP_SEQ_FEATURE                                      | domain: Ig-like C2-type 2                | RT |  | 5        | 4.5E-1 | 1.0E0  |
| SP_PIR_KEYWORDS                                     | <a href="#">Immunoglobulin domain</a>    | RT |  | 12       | 5.0E-1 | 9.0E-1 |
| <b>Annotation Cluster 27</b> Enrichment Score: 0.19 |                                          |    |  | <b>G</b> |        |        |
| SP_PIR_KEYWORDS                                     | <a href="#">glycoprotein</a>             | RT |  | 96       | 2.0E-1 | 6.8E-1 |
| UP_SEQ_FEATURE                                      | glycosylation site: N-linked (GlcNAc...) | RT |  | 91       | 5.5E-1 | 1.0E0  |
| SP_PIR_KEYWORDS                                     | <a href="#">membrane</a>                 | RT |  | 134      | 5.5E-1 | 9.2E-1 |
| UP_SEQ_FEATURE                                      | topological domain: Cytoplasmic          | RT |  | 67       | 8.4E-1 | 1.0E0  |
| UP_SEQ_FEATURE                                      | topological domain: Extracellular        | RT |  | 42       | 9.9E-1 | 1.0E0  |
| UP_SEQ_FEATURE                                      | transmembrane region                     | RT |  | 88       | 9.9E-1 | 1.0E0  |
| SP_PIR_KEYWORDS                                     | <a href="#">transmembrane</a>            | RT |  | 91       | 1.0E0  | 1.0E0  |
| <b>Annotation Cluster 28</b> Enrichment Score: 0.18 |                                          |    |  | <b>G</b> |        |        |
| UP_SEQ_FEATURE                                      | repeat: LRR 11                           | RT |  | 4        | 4.1E-1 | 1.0E0  |
| UP_SEQ_FEATURE                                      | repeat: LRR 10                           | RT |  | 4        | 5.1E-1 | 1.0E0  |
| UP_SEQ_FEATURE                                      | repeat: LRR 13                           | RT |  | 3        | 5.1E-1 | 1.0E0  |
| UP_SEQ_FEATURE                                      | repeat: LRR 12                           | RT |  | 3        | 6.2E-1 | 1.0E0  |
| UP_SEQ_FEATURE                                      | repeat: LRR 5                            | RT |  | 6        | 6.2E-1 | 1.0E0  |
| UP_SEQ_FEATURE                                      | repeat: LRR 9                            | RT |  | 4        | 6.3E-1 | 1.0E0  |
| UP_SEQ_FEATURE                                      | repeat: LRR 8                            | RT |  | 4        | 6.8E-1 | 1.0E0  |
| UP_SEQ_FEATURE                                      | repeat: LRR 4                            | RT |  | 6        | 7.0E-1 | 1.0E0  |
| UP_SEQ_FEATURE                                      | repeat: LRR 6                            | RT |  | 5        | 7.2E-1 | 1.0E0  |
| UP_SEQ_FEATURE                                      | repeat: LRR 3                            | RT |  | 6        | 7.8E-1 | 1.0E0  |
| UP_SEQ_FEATURE                                      | repeat: LRR 7                            | RT |  | 4        | 7.9E-1 | 1.0E0  |
| SP_PIR_KEYWORDS                                     | <a href="#">leucine-rich repeat</a>      | RT |  | 6        | 8.0E-1 | 9.8E-1 |
| UP_SEQ_FEATURE                                      | repeat: LRR 1                            | RT |  | 6        | 8.3E-1 | 1.0E0  |
| UP_SEQ_FEATURE                                      | repeat: LRR 2                            | RT |  | 6        | 8.3E-1 | 1.0E0  |
| <b>Annotation Cluster 29</b> Enrichment Score: 0.07 |                                          |    |  | <b>G</b> |        |        |
| UP_SEQ_FEATURE                                      | repeat: TPR 1                            | RT |  | 3        | 8.6E-1 | 1.0E0  |
| UP_SEQ_FEATURE                                      | repeat: TPR 2                            | RT |  | 3        | 8.6E-1 | 1.0E0  |
| SP_PIR_KEYWORDS                                     | <a href="#">tpr repeat</a>               | RT |  | 3        | 8.6E-1 | 9.9E-1 |
| <b>Annotation Cluster 30</b> Enrichment Score: 0.01 |                                          |    |  | <b>G</b> |        |        |
| SP_PIR_KEYWORDS                                     | <a href="#">transit peptide</a>          | RT |  | 7        | 9.7E-1 | 1.0E0  |
| UP_SEQ_FEATURE                                      | transit peptide: Mitochondrion           | RT |  | 7        | 9.8E-1 | 1.0E0  |
| SP_PIR_KEYWORDS                                     | <a href="#">mitochondrion</a>            | RT |  | 11       | 9.9E-1 | 1.0E0  |

were not clustered.

Please cite [Nature Protocols 2009; 4\(1\):44](#) & [Genome Biology 2003; 4\(5\):P3](#) within any publication that makes use of any methods inspired by DAVID.

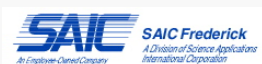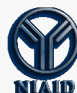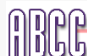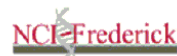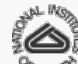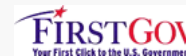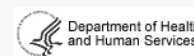

[Term of Service](#) | [Contact Us](#) | [Site Map](#)
