# Supplementary material for: Colonic miRNA Expression/Secretion, Regulated by Intestinal Epithelial PepT1, Plays an Important Role in Cell-to-Cell Communication during Colitis
Source: PubMed Central journal article supplement (PMC3929505; doi:10.1371/journal.pone.0087614), 2014-02-19
Supplement: pone.0087614.s004.pdf [file pone.0087614.s004.pdf]

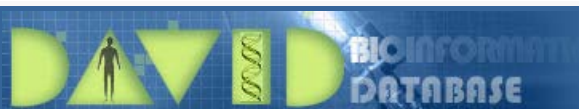

## Functional Annotation Clustering

[Help and Manual](#)

Current Gene List: List\_1

Current Background: Mus musculus

196 DAVID IDs

Options    **Classification Stringency**    Medium

15 Cluster(s)

[Download File](#)

| Annotation Cluster          | Enrichment Score                                                                |          |  | Count | P_Value | Benjamini |
|-----------------------------|---------------------------------------------------------------------------------|----------|--|-------|---------|-----------|
| <b>Annotation Cluster 1</b> | <b>Enrichment Score: 2.96</b>                                                   | <b>G</b> |  |       |         |           |
| SP_PIR_KEYWORDS             | <a href="#">transcription regulation</a>                                        | RT       |  | 34    | 7.8E-5  | 9.1E-3    |
| SP_PIR_KEYWORDS             | <a href="#">Transcription</a>                                                   | RT       |  | 34    | 9.1E-4  | 6.8E-2    |
| SP_PIR_KEYWORDS             | <a href="#">nucleus</a>                                                         | RT       |  | 59    | 1.6E-3  | 8.8E-2    |
| SP_PIR_KEYWORDS             | <a href="#">activator</a>                                                       | RT       |  | 14    | 2.0E-3  | 8.9E-2    |
| SP_PIR_KEYWORDS             | <a href="#">dna-binding</a>                                                     | RT       |  | 26    | 7.2E-3  | 2.1E-1    |
| <b>Annotation Cluster 2</b> | <b>Enrichment Score: 1.92</b>                                                   | <b>G</b> |  |       |         |           |
| SP_PIR_KEYWORDS             | <a href="#">isopeptide bond</a>                                                 | RT       |  | 9     | 9.5E-3  | 2.4E-1    |
| SP_PIR_KEYWORDS             | <a href="#">ubl conjugation</a>                                                 | RT       |  | 13    | 1.0E-2  | 2.3E-1    |
| UP_SEQ_FEATURE              | cross-link: Glycyl lysine isopeptide (Lys-Gly) (interchain with G-Cter in SUMO) | RT       |  | 5     | 1.9E-2  | 9.6E-1    |
| <b>Annotation Cluster 3</b> | <b>Enrichment Score: 1.79</b>                                                   | <b>G</b> |  |       |         |           |
| UP_SEQ_FEATURE              | calcium-binding region:2                                                        | RT       |  | 7     | 1.7E-3  | 7.6E-1    |
| UP_SEQ_FEATURE              | calcium-binding region:1                                                        | RT       |  | 7     | 2.6E-3  | 6.7E-1    |
| UP_SEQ_FEATURE              | domain:EF-hand 2                                                                | RT       |  | 7     | 1.0E-2  | 9.5E-1    |
| UP_SEQ_FEATURE              | domain:EF-hand 1                                                                | RT       |  | 6     | 3.8E-2  | 9.9E-1    |
| UP_SEQ_FEATURE              | domain:EF-hand 3                                                                | RT       |  | 4     | 6.8E-2  | 1.0E0     |
| SP_PIR_KEYWORDS             | <a href="#">calcium</a>                                                         | RT       |  | 12    | 1.5E-1  | 6.4E-1    |
| <b>Annotation Cluster 4</b> | <b>Enrichment Score: 1.12</b>                                                   | <b>G</b> |  |       |         |           |
| SP_PIR_KEYWORDS             | <a href="#">potassium transport</a>                                             | RT       |  | 5     | 2.7E-2  | 3.9E-1    |
| SP_PIR_KEYWORDS             | <a href="#">potassium</a>                                                       | RT       |  | 5     | 3.7E-2  | 4.7E-1    |
| SP_PIR_KEYWORDS             | <a href="#">potassium channel</a>                                               | RT       |  | 4     | 3.8E-2  | 4.5E-1    |
| SP_PIR_KEYWORDS             | <a href="#">voltage-gated channel</a>                                           | RT       |  | 5     | 5.5E-2  | 5.0E-1    |
| SP_PIR_KEYWORDS             | <a href="#">ion transport</a>                                                   | RT       |  | 9     | 2.2E-1  | 7.5E-1    |
| SP_PIR_KEYWORDS             | <a href="#">ionic channel</a>                                                   | RT       |  | 5     | 3.9E-1  | 8.8E-1    |
| <b>Annotation Cluster 5</b> | <b>Enrichment Score: 0.99</b>                                                   | <b>G</b> |  |       |         |           |
| SP_PIR_KEYWORDS             | <a href="#">atp-binding</a>                                                     | RT       |  | 23    | 1.8E-2  | 3.2E-1    |
| SP_PIR_KEYWORDS             | <a href="#">nucleotide-binding</a>                                              | RT       |  | 26    | 3.8E-2  | 4.4E-1    |
| SP_PIR_KEYWORDS             | <a href="#">kinase</a>                                                          | RT       |  | 13    | 7.3E-2  | 5.5E-1    |
| SP_PIR_KEYWORDS             | <a href="#">transferase</a>                                                     | RT       |  | 21    | 9.7E-2  | 5.9E-1    |
| UP_SEQ_FEATURE              | binding site:ATP                                                                | RT       |  | 11    | 9.8E-2  | 1.0E0     |
| UP_SEQ_FEATURE              | nucleotide phosphate-binding region:ATP                                         | RT       |  | 16    | 9.9E-2  | 1.0E0     |
| SP_PIR_KEYWORDS             | <a href="#">tyrosine-protein kinase</a>                                         | RT       |  | 4     | 1.3E-1  | 6.2E-1    |
| UP_SEQ_FEATURE              | domain:Protein kinase                                                           | RT       |  | 9     | 1.8E-1  | 1.0E0     |
| SP_PIR_KEYWORDS             | <a href="#">serine/threonine-protein kinase</a>                                 | RT       |  | 7     | 2.2E-1  | 7.5E-1    |
| UP_SEQ_FEATURE              | active site:Proton acceptor                                                     | RT       |  | 9     | 4.9E-1  | 1.0E0     |
| <b>Annotation Cluster 6</b> | <b>Enrichment Score: 0.76</b>                                                   | <b>G</b> |  |       |         |           |
| SP_PIR_KEYWORDS             | <a href="#">egf-like domain</a>                                                 | RT       |  | 6     | 8.8E-2  | 5.8E-1    |
| UP_SEQ_FEATURE              | domain:EGF-like 3                                                               | RT       |  | 3     | 1.8E-1  | 1.0E0     |

| UP_SEQ_FEATURE        | domain:EGF-like 1                                | RT                     |           | 3  | 3.4E-1 | 1.0E0  |
|-----------------------|--------------------------------------------------|------------------------|-----------|----|--------|--------|
| Annotation Cluster 7  |                                                  | Enrichment Score: 0.68 |           | G  |        |        |
|                       | Count                                            | P_Value                | Benjamini |    |        |        |
| UP_SEQ_FEATURE        | repeat:ANK 9                                     | RT                     |           | 3  | 5.8E-2 | 1.0E0  |
| UP_SEQ_FEATURE        | repeat:ANK 8                                     | RT                     |           | 3  | 7.4E-2 | 1.0E0  |
| UP_SEQ_FEATURE        | repeat:ANK 7                                     | RT                     |           | 3  | 1.2E-1 | 1.0E0  |
| SP_PIR_KEYWORDS       | <a href="#">ank_repeat</a>                       | RT                     |           | 5  | 2.1E-1 | 7.4E-1 |
| UP_SEQ_FEATURE        | repeat:ANK 6                                     | RT                     |           | 3  | 2.3E-1 | 1.0E0  |
| UP_SEQ_FEATURE        | repeat:ANK 3                                     | RT                     |           | 4  | 2.8E-1 | 1.0E0  |
| UP_SEQ_FEATURE        | repeat:ANK 5                                     | RT                     |           | 3  | 3.5E-1 | 1.0E0  |
| UP_SEQ_FEATURE        | repeat:ANK 1                                     | RT                     |           | 4  | 3.8E-1 | 1.0E0  |
| UP_SEQ_FEATURE        | repeat:ANK 2                                     | RT                     |           | 4  | 3.8E-1 | 1.0E0  |
| UP_SEQ_FEATURE        | repeat:ANK 4                                     | RT                     |           | 3  | 4.3E-1 | 1.0E0  |
| Annotation Cluster 8  |                                                  | Enrichment Score: 0.64 |           | G  |        |        |
| SP_PIR_KEYWORDS       | <a href="#">golgi_apparatus</a>                  | RT                     |           | 10 | 1.3E-1 | 6.3E-1 |
| SP_PIR_KEYWORDS       | <a href="#">Signal-anchor</a>                    | RT                     |           | 7  | 2.6E-1 | 7.8E-1 |
| UP_SEQ_FEATURE        | topological domain:Luminal                       | RT                     |           | 7  | 3.4E-1 | 1.0E0  |
| Annotation Cluster 9  |                                                  | Enrichment Score: 0.44 |           | G  |        |        |
| SP_PIR_KEYWORDS       | <a href="#">zinc_finger</a>                      | RT                     |           | 3  | 1.5E-1 | 6.3E-1 |
| UP_SEQ_FEATURE        | zinc finger region:C2H2-type 3                   | RT                     |           | 5  | 3.3E-1 | 1.0E0  |
| UP_SEQ_FEATURE        | zinc finger region:C2H2-type 1                   | RT                     |           | 5  | 3.3E-1 | 1.0E0  |
| UP_SEQ_FEATURE        | zinc finger region:C2H2-type 2                   | RT                     |           | 5  | 3.5E-1 | 1.0E0  |
| UP_SEQ_FEATURE        | zinc finger region:C2H2-type 4                   | RT                     |           | 4  | 4.2E-1 | 1.0E0  |
| SP_PIR_KEYWORDS       | <a href="#">zinc-finger</a>                      | RT                     |           | 14 | 5.1E-1 | 9.2E-1 |
| UP_SEQ_FEATURE        | zinc finger region:C2H2-type 5                   | RT                     |           | 3  | 6.4E-1 | 1.0E0  |
| Annotation Cluster 10 |                                                  | Enrichment Score: 0.34 |           | G  |        |        |
| SP_PIR_KEYWORDS       | <a href="#">palmitate</a>                        | RT                     |           | 4  | 3.7E-1 | 8.8E-1 |
| SP_PIR_KEYWORDS       | <a href="#">lipoprotein</a>                      | RT                     |           | 8  | 4.3E-1 | 8.9E-1 |
| UP_SEQ_FEATURE        | lipid moiety-binding region:S-palmitoyl cysteine | RT                     |           | 3  | 6.0E-1 | 1.0E0  |
| Annotation Cluster 11 |                                                  | Enrichment Score: 0.29 |           | G  |        |        |
| UP_SEQ_FEATURE        | domain:Ig-like C2-type 1                         | RT                     |           | 3  | 4.4E-1 | 1.0E0  |
| UP_SEQ_FEATURE        | domain:Ig-like C2-type 2                         | RT                     |           | 3  | 4.5E-1 | 1.0E0  |
| SP_PIR_KEYWORDS       | <a href="#">Immunoglobulin_domain</a>            | RT                     |           | 5  | 6.9E-1 | 9.7E-1 |
| Annotation Cluster 12 |                                                  | Enrichment Score: 0.17 |           | G  |        |        |
| SP_PIR_KEYWORDS       | <a href="#">signal</a>                           | RT                     |           | 33 | 4.9E-1 | 9.1E-1 |
| SP_PIR_KEYWORDS       | <a href="#">glycoprotein</a>                     | RT                     |           | 39 | 5.4E-1 | 9.3E-1 |
| SP_PIR_KEYWORDS       | <a href="#">Secreted</a>                         | RT                     |           | 15 | 6.5E-1 | 9.6E-1 |
| UP_SEQ_FEATURE        | signal peptide                                   | RT                     |           | 33 | 6.8E-1 | 1.0E0  |
| SP_PIR_KEYWORDS       | <a href="#">disulfide_bond</a>                   | RT                     |           | 24 | 7.8E-1 | 9.9E-1 |
| UP_SEQ_FEATURE        | glycosylation site:N-linked (GlcNAc...)          | RT                     |           | 36 | 8.2E-1 | 1.0E0  |
| UP_SEQ_FEATURE        | disulfide bond                                   | RT                     |           | 24 | 8.4E-1 | 1.0E0  |
| Annotation Cluster 13 |                                                  | Enrichment Score: 0.15 |           | G  |        |        |
| SP_PIR_KEYWORDS       | <a href="#">zinc-finger</a>                      | RT                     |           | 14 | 5.1E-1 | 9.2E-1 |
| SP_PIR_KEYWORDS       | <a href="#">zinc</a>                             | RT                     |           | 18 | 7.9E-1 | 9.9E-1 |
| SP_PIR_KEYWORDS       | <a href="#">metal-binding</a>                    | RT                     |           | 24 | 8.9E-1 | 1.0E0  |
| Annotation Cluster 14 |                                                  | Enrichment Score: 0.13 |           | G  |        |        |
| SP_PIR_KEYWORDS       | <a href="#">glycoprotein</a>                     | RT                     |           | 39 | 5.4E-1 | 9.3E-1 |
| UP_SEQ_FEATURE        | topological domain:Cytoplasmic                   | RT                     |           | 32 | 6.0E-1 | 1.0E0  |
| SP_PIR_KEYWORDS       | <a href="#">membrane</a>                         | RT                     |           | 58 | 6.1E-1 | 9.5E-1 |
| UP_SEQ_FEATURE        | glycosylation site:N-linked (GlcNAc...)          | RT                     |           | 36 | 8.2E-1 | 1.0E0  |
| UP_SEQ_FEATURE        | topological domain:Extracellular                 | RT                     |           | 22 | 8.3E-1 | 1.0E0  |
| UP_SEQ_FEATURE        | transmembrane region                             | RT                     |           | 41 | 9.1E-1 | 1.0E0  |
| SP_PIR_KEYWORDS       | <a href="#">transmembrane</a>                    | RT                     |           | 41 | 1.0E0  | 1.0E0  |

| Annotation Cluster 15 |                                 | Enrichment Score: 0.04 |  | G |  | Count | P_Value | Benjamini |
|-----------------------|---------------------------------|------------------------|--|---|--|-------|---------|-----------|
| SP_PIR_KEYWORDS       | <a href="#">transit peptide</a> | RT                     |  |   |  | 4     | 8.7E-1  | 1.0E0     |
| UP_SEQ_FEATURE        | transit peptide:Mitochondrion   | RT                     |  |   |  | 4     | 8.9E-1  | 1.0E0     |
| SP_PIR_KEYWORDS       | <a href="#">mitochondrion</a>   | RT                     |  |   |  | 5     | 9.7E-1  | 1.0E0     |

were not clustered.

Please cite [Nature Protocols 2009; 4\(1\):44](#) & [Genome Biology 2003; 4\(5\):P3](#) within any publication that makes use of any methods inspired by **DAVID**.

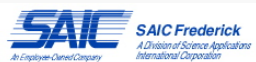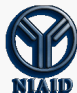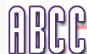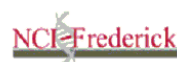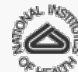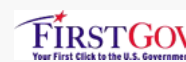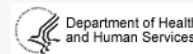

[Term of Service](#) | [Contact Us](#) | [Site Map](#)
