# Supplementary material for: Colonic miRNA Expression/Secretion, Regulated by Intestinal Epithelial PepT1, Plays an Important Role in Cell-to-Cell Communication during Colitis
Source: PubMed Central journal article supplement (PMC3929505; doi:10.1371/journal.pone.0087614), 2014-02-19
Supplement: pone.0087614.s005.pdf [file pone.0087614.s005.pdf]

**Table S5**

| <b>Primer</b>     | <b>Sequence</b>            | <b>Description</b>           |
|-------------------|----------------------------|------------------------------|
| snoRNA234         | GGAACTGAATCTAAGTGATTTAACAA | Small RNA 234 forward primer |
| mmT-miR-132F      | TAACAGTCTACAGCCATGGTCG     | MiRNA 132 forward primer     |
| mmT-miR-1937cF    | ATCCCGGAAGAGCCCCCA         | MiRNA 1937c forward primer   |
| mmT-miR-762F      | GGGGCTGGGGCCGGGACAGAGC     | MiRNA 762 forward primer     |
| mmT-miR-1937aF    | AATCCCGGACGAGCCCCCA        | MiRNA 1937a forward primer   |
| mmT-miR-1937bF    | ATCCCGGACGAGCCCCCA         | MiRNA 1937b forward primer   |
| mmT-miR-2145 F    | AGCAGGGTCGGGCCTGGTT        | MiRNA 2145 forward primer    |
| mmT-miR-200bF     | TAATACTGCCTGGTAATGATGA     | MiRNA 200bforward primer     |
| mmT-miR-3077F     | CTGACTCCCTGCTTCTCCGCAG     | MiRNA 3077 forward primer    |
| mmT-miR-429F      | TAATACTGTCTGGTAATGCCGT     | MiRNA 429 forward primer     |
| mmT-miR-23aF      | ATCACATTGCCAGGGATTTCC      | MiRNA 23a forward primer     |
| mmT-miR-23bF      | ATCACATTGCCAGGGATTACC      | MiRNA 23b forward primer     |
| mmT-miR-199a-3p F | ACAGTAGTCTGCACATTGGTTA     | MiRNA 199a-3p forward primer |
| mmT-let-7c F      | TGAGGTAGTAGGTTGTATGGTT     | MiRNA 7c forward primer      |
| mmT-let-7b F      | TGAGGTAGTAGGTTGTGTGGTT     | MiRNA 7b forward primer      |
| mmT-miR-1934F     | TCTGGTCCCCTGCTTCGTCCTCT    | MiRNA 1934 forward primer    |
| 36B4 F            | TCCAGGCTTTGGGCATCA         | 36B4 forward primer          |
| 36B4 R            | CTTTATCAGCTGCACATCACTCAGA  | 36B4 reverse primer          |
| Marcksl-1 F       | AGGAGGGAGGGAGGTCTGTA       | Marcksl-1 forward Primer     |
| Marcksl-1 R       | GGGGTTTGGCCATTAAAAGT       | Marcksl-1 reverse Primer     |
